# Supplementary material
Source: publisher figshare collection journal article supplement (https://gsapubs.figshare.com/ndownloader/files/22757669)
Supplement: Supplementary file 1 [file 22757669]

Figure DR1  
(Data Repository item)

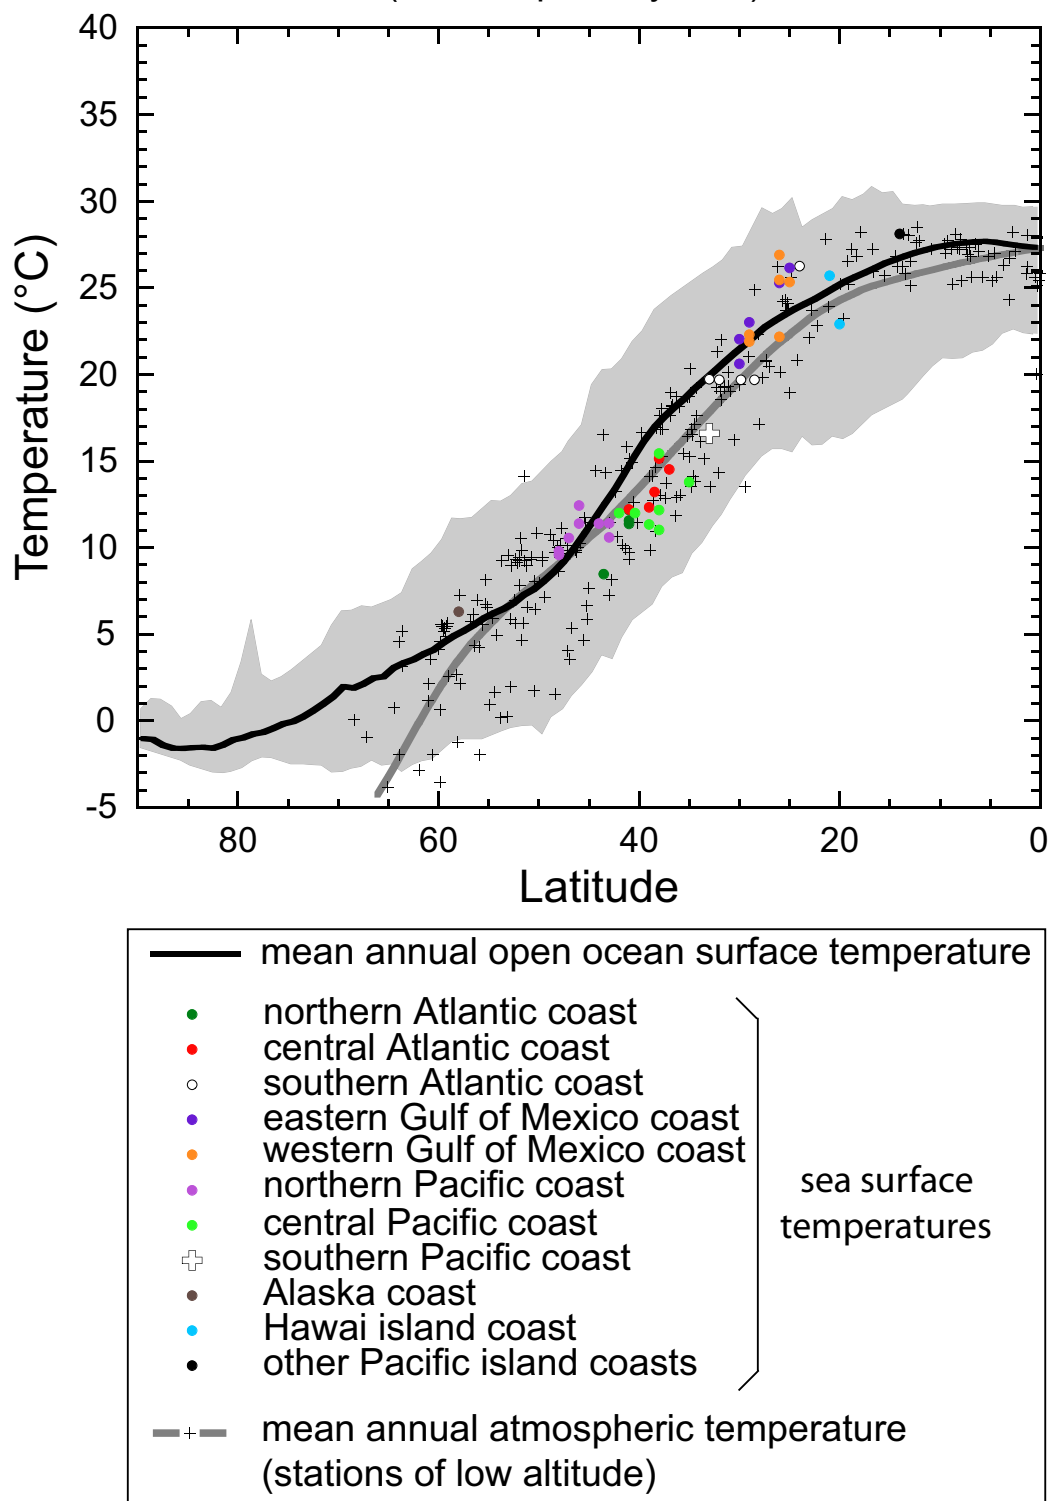

**Figure DR1.** Comparison of modern sea surface temperature from the open ocean to that from coastal environments, and of surface air temperature from low altitude environments. The modern SST gradient (mean annual temperatures averaged over longitude and hemispheres) is represented by the black bold solid line. The grey envelope represents the maximum range of modern seasonal SST when the whole range of longitude is considered. Modern SSTs are from the data base LEVITUS94. The coastal sea surface temperatures are mean annual temperatures calculated from monthly estimates recovered by the National Oceanographic Data Center (1983). The surface air temperatures are mean annual temperatures from the IAEA/WMO (2001) data base. Only the stations of low altitude (below 300m) have been considered.

Table DR1 (Data Repository Item). Oxygen isotope compositions of fish teeth measured in this study and compiled from the literature.

|                              |  | Locality             | Stratigraphic age (Ammonte Zone or horizon) | Fauna, remain                         | Paleolatitude | $\delta^{18}\text{O}$<br>(‰ SMOW) | Temperature 1<br>(°C) | Temperature 2<br>(°C) | Error on<br>temperature 1 (°C) | Error on<br>temperature 2 (°C) |
|------------------------------|--|----------------------|---------------------------------------------|---------------------------------------|---------------|-----------------------------------|-----------------------|-----------------------|--------------------------------|--------------------------------|
| <b>CENOMANIAN-TURONIAN</b>   |  |                      |                                             |                                       |               |                                   |                       |                       |                                |                                |
| This work                    |  |                      |                                             |                                       |               |                                   |                       |                       |                                |                                |
| Jurg3                        |  | Vienenburg (Germany) | Cenomanian                                  |                                       | 43.00         | 21.20                             | 16.1                  | 16.1                  | ±1.1                           | ±1.1                           |
| S2d1                         |  | Mokresz (Poland)     | Lower Cenomanian (Mantelliceras mantelli)   | <i>Cretiolamna appendiculata</i> , Te | 44.00         | 20.50                             | 19.1                  | 19.1                  | ±1.1                           | ±1.1                           |
| S4d1                         |  | Skotniki (Poland)    | Lower Cenomanian                            | <i>Sphenodus</i> sp., Te              | 44.00         | 19.89                             | 21.8                  | 21.8                  | ±1.2                           | ±1.2                           |
| S3d1                         |  | Skotniki (Poland)    | Lower Cenomanian                            | <i>Oidius appendiculatus</i> , Te     | 44.00         | 20.52                             | 19.0                  | 19.0                  | ±1.1                           | ±1.1                           |
| SSd1                         |  | Skotniki (Poland)    | Lower Cenomanian                            | <i>Sphenodus</i> sp., Te              | 44.00         | 18.80                             | 26.6                  | 26.5                  | ±1.4                           | ±1.4                           |
| SSd1                         |  | Skotniki (Poland)    | Lowermost Cenomanian                        | <i>Ptychodus mammillaris</i> , Te     | 44.00         | 17.60                             | 31.8                  | 31.8                  | ±1.5                           | ±1.5                           |
| Data from literature         |  |                      |                                             |                                       |               |                                   |                       |                       |                                |                                |
| Kolodny and Luz (1991)       |  | Angola               | Cenomanian                                  | <i>Cretiolamna appendiculata</i>      | -23.0         | 18.8                              | 26.6                  | 28.9                  | ±1.4                           | ±1.4                           |
| Kolodny and Raab (1988)      |  | Israel               | Cenomanian                                  | <i>Pachyrhina</i>                     | 12.0          | 17.4                              | 32.7                  | 35.3                  | ±1.6                           | ±1.6                           |
| Kolodny and Raab (1988)      |  | Israel               | Cenomanian                                  | <i>Eubodectes</i>                     | 12.0          | 17.8                              | 31.0                  | 33.6                  | ±1.5                           | ±1.6                           |
| Kolodny and Raab (1988)      |  | Israel               | Cenomanian                                  | <i>Pycnodontidae</i>                  | 12.0          | 17.9                              | 30.5                  | 33.1                  | ±1.5                           | ±1.6                           |
| Kolodny and Raab (1988)      |  | Israel               | Cenomanian                                  | shark                                 | 12.0          | 17.8                              | 31.0                  | 33.6                  | ±1.5                           | ±1.6                           |
| Kolodny and Raab (1988)      |  | Israel               | Cenomanian                                  | Teleostean                            | 12.0          | 17.4                              | 32.7                  | 35.3                  | ±1.6                           | ±1.6                           |
| Kolodny and Luz (1991)       |  | Israel               | Upper Cenomanian                            | undetermined                          | 17.8          | 17.8                              | 31.0                  | 33.6                  | ±1.5                           | ±1.6                           |
| Pucelat <i>et al.</i> (2003) |  | France               | Cenomanian                                  | undetermined                          | 38.4          | 20.8                              | 17.8                  | 18.5                  | ±1.1                           | ±1.1                           |
| Pucelat <i>et al.</i> (2003) |  | France               | Cenomanian                                  | undetermined                          | 38.4          | 19.0                              | 25.7                  | 26.4                  | ±1.4                           | ±1.4                           |
| Pucelat <i>et al.</i> (2003) |  | France               | Cenomanian                                  | Lamiform                              | 38.4          | 18.6                              | 27.5                  | 28.1                  | ±1.4                           | ±1.4                           |
| Pucelat <i>et al.</i> (2003) |  | France               | Upper Cenomanian                            | <i>Squalicorax falcatius</i>          | 38.4          | 19.3                              | 24.4                  | 25.1                  | ±1.3                           | ±1.3                           |
| Pucelat <i>et al.</i> (2003) |  | France               | Upper Cenomanian                            | <i>Carcharias ammonensis</i>          | 38.4          | 19.5                              | 23.5                  | 24.2                  | ±1.3                           | ±1.3                           |
| Pucelat <i>et al.</i> (2003) |  | France               | Turonian                                    | Lamiform                              | 38.4          | 18.4                              | 28.3                  | 29.0                  | ±1.4                           | ±1.5                           |
| Pucelat <i>et al.</i> (2003) |  | France               | Turonian                                    | undetermined                          | 38.4          | 20.1                              | 20.9                  | 21.6                  | ±1.2                           | ±1.2                           |
| Kolodny and Raab (1988)      |  | Sinai (Egypt)        | Turonian                                    | <i>Palaeobalistium</i> ? sp.          | 8.3           | 17.2                              | 33.6                  | 36.0                  | ±1.6                           | ±1.7                           |
| Pucelat <i>et al.</i> (2003) |  | Goulimma (Morocco)   | Lower Turonian                              | <i>Pachyrhizodontidae</i>             | 21.8          | 17.2                              | 33.6                  | 36.0                  | ±1.6                           | ±1.7                           |

CAMPANIAN-MAASTRICHTIAN

This work

|         |  |                                       |                                                     |                                       |        |       |      |      |      |      |
|---------|--|---------------------------------------|-----------------------------------------------------|---------------------------------------|--------|-------|------|------|------|------|
| Mart1   |  | Las Tablas (Chile)                    | Upper Campanian-Lower Maastrichtian                 | undetermined, Te                      | -37.05 | 21.00 | 16.9 | 17.8 | ±1.1 | ±1.1 |
| Marzbis |  | Agarobob (Chile)                      | Upper Campanian-Lower Maastrichtian                 | undetermined, Te                      | -34.10 | 21.17 | 16.2 | 17.4 | ±1.1 | ±1.1 |
| Cum7    |  | Russell County (Alabama, USA)         | Lowermost Campanian (Blufftown Formation)           | <i>Squalicorax kaupi</i> , Te         | 36.10  | 19.79 | 22.2 | 23.2 | ±1.2 | ±1.3 |
| Cum10   |  | Bullcock County (Alabama, USA)        | Lowermost Campanian (Blufftown Formation)           | <i>Squalicorax kaupi</i> , Te         | 36.10  | 20.87 | 17.5 | 18.5 | ±1.1 | ±1.1 |
| Par5    |  | Elisdale (New Jersey, USA)            | Campanian (Lower Marshalltown Formation)            | <i>Scapanorhynchus texanus</i> , Te   | 40.70  | 20.77 | 17.9 | 18.3 | ±1.1 | ±1.1 |
| SV1     |  | Asen (Sweden)                         | uppermost Lower Campanian                           | <i>Squalicorax kaupi</i> , Te         | 46.90  | 19.62 | 23.0 | 22.6 | ±1.3 | ±1.3 |
| SV2     |  | Asen (Sweden)                         | uppermost Lower Campanian                           | <i>Cretiolamna appendiculata</i> , Te | 46.90  | 20.94 | 17.2 | 16.8 | ±1.1 | ±1.1 |
| A12     |  | Engula (Morocco)                      | Maastrichtian                                       | undetermined, Te                      | 20.50  | 19.75 | 22.4 | 24.9 | ±1.2 | ±1.3 |
| A14     |  | Engula (Morocco)                      | Maastrichtian                                       | undetermined, Te                      | 20.50  | 19.20 | 24.8 | 27.3 | ±1.1 | ±1.4 |
| A15     |  | Engula (Morocco)                      | Maastrichtian                                       | undetermined, Te                      | 20.50  | 20.63 | 18.6 | 21.1 | ±1.3 | ±1.3 |
| A16     |  | Engula (Morocco)                      | Maastrichtian                                       | undetermined, Te                      | 20.50  | 19.67 | 22.8 | 25.3 | ±1.3 | ±1.3 |
| c2cr    |  | Benguerir (Morocco)                   | Maastrichtian                                       | <i>Cretiolamna marocana</i> , Te      | 22.00  | 18.89 | 26.2 | 28.6 | ±1.4 | ±1.4 |
| c2sq    |  | Benguerir (Morocco)                   | Maastrichtian                                       | <i>Cretiolamna marocana</i> , Te      | 22.00  | 19.69 | 22.7 | 26.2 | ±1.3 | ±1.3 |
| c3cr    |  | Benguerir (Morocco)                   | Maastrichtian                                       | <i>Squalicorax pristodontus</i> , Te  | 22.00  | 20.37 | 19.7 | 22.1 | ±1.2 | ±1.2 |
| c3sq    |  | Benguerir (Morocco)                   | Maastrichtian                                       | <i>Squalicorax pristodontus</i> , Te  | 22.00  | 19.43 | 23.8 | 26.2 | ±1.3 | ±1.4 |
| c4cr    |  | Benguerir (Morocco)                   | Maastrichtian                                       | <i>Cretiolamna marocana</i> , Te      | 22.00  | 20.61 | 18.7 | 21.1 | ±1.1 | ±1.2 |
| c4cr1   |  | Benguerir (Morocco)                   | Maastrichtian                                       | <i>Cretiolamna marocana</i> , Te      | 22.00  | 19.51 | 23.5 | 25.9 | ±1.3 | ±1.4 |
| c4sq    |  | Benguerir (Morocco)                   | Maastrichtian                                       | <i>Cretiolamna marocana</i> , Te      | 22.00  | 19.30 | 24.4 | 26.8 | ±1.3 | ±1.4 |
| c4sq1   |  | Benguerir (Morocco)                   | Maastrichtian                                       | <i>Squalicorax pristodontus</i> , Te  | 22.00  | 22.00 | 23.7 | 26.1 | ±1.3 | ±1.4 |
| c6cr    |  | Benguerir (Morocco)                   | Maastrichtian                                       | <i>Squalicorax pristodontus</i> , Te  | 22.00  | 19.50 | 23.5 | 25.9 | ±1.3 | ±1.4 |
| c6sq    |  | Benguerir (Morocco)                   | Maastrichtian                                       | <i>Cretiolamna marocana</i> , Te      | 22.00  | 19.76 | 22.4 | 24.8 | ±1.2 | ±1.3 |
| SE1     |  | Nasliov (Poland)                      | Maastrichtian                                       | <i>Squalicorax pristodontus</i> , Te  | 40.00  | 22.00 | 23.9 | 25.5 | ±1.2 | ±1.3 |
| SE10    |  | Nasliov (Poland)                      | Maastrichtian/Danian boundary                       | <i>Squalicorax pristodontus</i> , Tw  | 40.00  | 21.88 | 13.1 | 13.6 | ±1.0 | ±1.0 |
| SE10    |  | Nasliov (Poland)                      | Maastrichtian/Danian boundary                       | <i>Squalicorax</i> sp., Tw            | 40.00  | 22.00 | 12.6 | 13.0 | ±0.9 | ±1.0 |
| SE10    |  | Nasliov (Poland)                      | Maastrichtian/Danian boundary                       | <i>Odonaspis</i> sp., Tw              | 40.00  | 20.90 | 17.4 | 17.9 | ±1.1 | ±1.1 |
| Par1    |  | Inversand Marl Pits (New Jersey, USA) | uppermost Maastrichtian/basal Homerstown Formation) | <i>Enchodus ferox</i> , Te            | 40.30  | 21.58 | 14.4 | 14.8 | ±1.0 | ±1.0 |
| Par1    |  | Inversand Marl Pits (New Jersey, USA) | uppermost Maastrichtian/basal Homerstown Formation) | <i>Enchodus ferox</i> , Te            | 40.30  | 21.37 | 15.3 | 15.8 | ±1.0 | ±1.0 |
| Case1   |  | Willow Brook (New Jersey, USA)        | uppermost Maastrichtian/basal Homerstown Formation) | <i>Enchodus ferox</i> , Te            | 40.30  | 22.46 | 10.5 | 11.0 | ±0.9 | ±0.9 |
| Case1   |  | Willow Brook (New Jersey, USA)        | Lower Maastrichtian                                 | <i>Squalicorax pristodontus</i> , Te  | 40.70  | 21.58 | 14.4 | 14.8 | ±1.0 | ±1.0 |
| Case2   |  | Hop Brook (New Jersey, USA)           | Middle Maastrichtian                                | <i>Squalicorax pristodontus</i> , Te  | 40.70  | 21.22 | 16.0 | 16.4 | ±1.1 | ±1.1 |
| Case3   |  | Hop Brook (New Jersey, USA)           | Middle Maastrichtian                                | <i>Squalicorax kaupi</i> , Te         | 40.70  | 21.40 | 15.2 | 15.6 | ±1.0 | ±1.0 |
| Case10  |  | Hop Brook (New Jersey, USA)           | Middle Maastrichtian                                | Archaeolamna koplinensis, Te          | 40.70  | 21.52 | 14.7 | 15.1 | ±1.0 | ±1.0 |
| Case11  |  | Willow Brook (New Jersey, USA)        | Lower Maastrichtian                                 | Archaeolamna koplinensis, Te          | 40.70  | 19.09 | 25.3 | 25.7 | ±1.3 | ±1.3 |
| Case15  |  | Hop Brook (New Jersey, USA)           | Middle Maastrichtian                                | <i>Anopodus phiasopus</i> , Tw        | 40.70  | 21.89 | 13.0 | 13.4 | ±1.0 | ±1.0 |
| Case2   |  | Willow Brook (New Jersey, USA)        | Lower Maastrichtian                                 | <i>Carcharias</i> sp., Te             | 40.70  | 20.77 | 17.9 | 18.3 | ±1.1 | ±1.1 |
| Col1    |  | Maastricht (The Netherlands)          | Maastrichtian                                       | undetermined, Te                      | 41.40  | 22.32 | 11.2 | 11.5 | ±0.9 | ±0.9 |

Table DR1 (continued)

| Data from literature         | Locality              | Stratigraphic age (Ammonte Zone or horizon) | Fauna, remain                             | Paleolatitude<br>(°N, SMOW) | $\delta^{18}\text{O}$ |      | Temperature 1 |      | Temperature 2      |                    | Error on           |                    | Error on           |                    |
|------------------------------|-----------------------|---------------------------------------------|-------------------------------------------|-----------------------------|-----------------------|------|---------------|------|--------------------|--------------------|--------------------|--------------------|--------------------|--------------------|
|                              |                       |                                             |                                           |                             | ‰ SMOW                | (°C) | (°C)          | (°C) | temperature 1 (°C) | temperature 2 (°C) | temperature 1 (°C) | temperature 2 (°C) | temperature 1 (°C) | temperature 2 (°C) |
| Kolodny and Raab (1988)      | Israel                | Maastrichtian                               | <i>S. quatina</i> ? sp.                   | 13.0                        | 20.3                  | 20.0 | 22.6          |      |                    |                    | $\pm 1.2$          |                    | $\pm 1.3$          |                    |
| Kolodny and Raab (1988)      | Israel                | Maastrichtian                               | Teleostean                                | 13.0                        | 19.8                  | 22.2 | 24.8          |      |                    |                    | $\pm 1.2$          |                    | $\pm 1.3$          |                    |
| Pucéat <i>et al.</i> (2003)  | Israel                | Maastrichtian                               | <i>Cretiolamna</i> sp.                    | 13.0                        | 20.0                  | 21.3 | 24.0          |      |                    |                    | $\pm 1.2$          |                    | $\pm 1.3$          |                    |
| Kolodny and Luz (1991)       | Yousseoufia (Morocco) | Maastrichtian                               | <i>Cretiolamna maroccana</i>              | 22.2                        | 19.3                  | 24.4 | 26.8          |      |                    |                    | $\pm 1.3$          |                    | $\pm 1.4$          |                    |
| Pucéat <i>et al.</i> (2003)  | Yousseoufia (Morocco) | Maastrichtian                               | undetermined                              | 22.2                        | 20.4                  | 19.6 | 22.0          |      |                    |                    | $\pm 1.2$          |                    | $\pm 1.2$          |                    |
| Pucéat <i>et al.</i> (2003)  | Oued Zem (Morocco)    | Maastrichtian                               | Lamiform                                  | 22.1                        | 20.2                  | 20.4 | 22.8          |      |                    |                    | $\pm 1.2$          |                    | $\pm 1.3$          |                    |
| Lécuyer <i>et al.</i> (1993) | Benquerr (Morocco)    | Lower Maastrichtian                         | <i>Cretiolamna</i> sp.                    | 20.5                        | 18.9                  | 26.1 | 28.6          |      |                    |                    | $\pm 1.4$          |                    | $\pm 1.4$          |                    |
| Lécuyer <i>et al.</i> (1993) | Benquerr (Morocco)    | Lower Maastrichtian                         | <i>Squalicorax</i> sp.                    | 22.0                        | 20.3                  | 20.0 | 22.4          |      |                    |                    | $\pm 1.2$          |                    | $\pm 1.2$          |                    |
| Lécuyer <i>et al.</i> (1993) | Benquerr (Morocco)    | Lower Maastrichtian                         | <i>Squalicorax pristodontus</i>           | 22.0                        | 20.3                  | 20.0 | 22.4          |      |                    |                    | $\pm 1.2$          |                    | $\pm 1.2$          |                    |
| Lécuyer <i>et al.</i> (1993) | Sidi Daoui (Morocco)  | Upper Maastrichtian                         | <i>Cretiolamna blauriculata maroccana</i> | 22.1                        | 20.0                  | 21.3 | 23.7          |      |                    |                    | $\pm 1.2$          |                    | $\pm 1.3$          |                    |
| Kolodny and Luz (1991)       | California (USA)      | Maastrichtian                               | <i>E. nichodus</i>                        | 48.4                        | 22.1                  | 12.1 | 11.5          |      |                    |                    | $\pm 0.9$          |                    | $\pm 0.9$          |                    |
| Kolodny and Luz (1991)       | California (USA)      | Maastrichtian                               | <i>Pliosaurus tuckeri</i>                 | 48.4                        | 22.3                  | 11.2 | 10.6          |      |                    |                    | $\pm 0.9$          |                    | $\pm 0.9$          |                    |
| Pucéat <i>et al.</i> (2003)  | Eben-Emael (Belgium)  | Upper Maastrichtian                         | <i>Squalicorax pristodontus</i>           | 41.0                        | 18.9                  | 15.2 | 15.5          |      |                    |                    | $\pm 1.0$          |                    | $\pm 1.0$          |                    |
| Kolodny and Luz (1991)       | Agadir (Morocco)      | Campanian                                   | <i>Cretiolamna appendiculata</i>          | 21.1                        | 18.4                  | 26.1 | 28.6          |      |                    |                    | $\pm 1.4$          |                    | $\pm 1.4$          |                    |
| Kolodny and Raab (1988)      | Jordan                | Lower Campanian                             | <i>Squalicorax pristodontus</i>           | 11.4                        | 18.4                  | 28.3 | 30.9          |      |                    |                    | $\pm 1.4$          |                    | $\pm 1.5$          |                    |
| Kolodny and Raab (1988)      | Israel                | Campanian                                   | <i>Enchodus bursuaxi</i>                  | 11.8                        | 20.0                  | 21.3 | 23.9          |      |                    |                    | $\pm 1.2$          |                    | $\pm 1.3$          |                    |
| Kolodny and Raab (1988)      | Israel                | Campanian                                   | <i>Enchodus bursuaxi</i>                  | 11.8                        | 19.7                  | 22.6 | 25.2          |      |                    |                    | $\pm 1.3$          |                    | $\pm 1.3$          |                    |
| Kolodny and Raab (1988)      | Israel                | Campanian                                   | <i>Enchodus libycus</i>                   | 11.8                        | 19.1                  | 25.3 | 27.9          |      |                    |                    | $\pm 1.3$          |                    | $\pm 1.4$          |                    |
| Kolodny and Raab (1988)      | Israel                | Campanian                                   | <i>Squalicorax kaupi</i>                  | 11.8                        | 18.7                  | 27.0 | 29.6          |      |                    |                    | $\pm 1.4$          |                    | $\pm 1.5$          |                    |
| Kolodny and Raab (1988)      | Israel                | Campanian                                   | <i>Lamna blauriculata</i>                 | 11.8                        | 19.3                  | 24.4 | 27.0          |      |                    |                    | $\pm 1.3$          |                    | $\pm 1.4$          |                    |
| Kolodny and Raab (1988)      | Israel                | Campanian                                   | <i>Lamna blauriculata</i>                 | 22.1                        | 19.5                  | 23.5 | 25.9          |      |                    |                    | $\pm 1.3$          |                    | $\pm 1.4$          |                    |
| Kolodny and Luz (1991)       | Morocco               | Lower Campanian                             | <i>Scapanorhynchus texanus</i>            | 40.7                        | 20.2                  | 20.4 | 20.8          |      |                    |                    | $\pm 1.2$          |                    | $\pm 1.2$          |                    |
| Pucéat <i>et al.</i> (2003)  | New Jersey (USA)      | Upper Campanian                             | undetermined                              | 37.4                        | 21.4                  | 15.2 | 16.0          |      |                    |                    | $\pm 1.0$          |                    | $\pm 1.1$          |                    |
| Pucéat <i>et al.</i> (2003)  | France                | Upper Campanian                             | undetermined                              | 37.4                        | 21.6                  | 14.3 | 15.1          |      |                    |                    | $\pm 1.0$          |                    | $\pm 1.0$          |                    |
| Pucéat <i>et al.</i> (2003)  | France                | Campanian                                   | undetermined                              | 37.4                        | 19.2                  | 24.8 | 26.6          |      |                    |                    | $\pm 1.3$          |                    | $\pm 1.3$          |                    |
| Pucéat <i>et al.</i> (2003)  | France                | Lower Campanian                             | <i>Anomotodon</i> sp.                     | 37.4                        | 21.2                  | 16.1 | 16.9          |      |                    |                    | $\pm 1.1$          |                    | $\pm 1.1$          |                    |
| Pucéat <i>et al.</i> (2003)  | France                | Lower Campanian                             | <i>Squalicorax kaupi</i>                  | 37.4                        | 20.4                  | 19.6 | 20.4          |      |                    |                    | $\pm 1.2$          |                    | $\pm 1.2$          |                    |
| Pucéat <i>et al.</i> (2003)  | France                | Lower Campanian                             | undetermined                              | 37.4                        | 20.9                  | 17.4 | 18.2          |      |                    |                    | $\pm 1.1$          |                    | $\pm 1.1$          |                    |
| Pucéat <i>et al.</i> (2003)  | France                | Lower Campanian                             | <i>Scapanorhynchus</i> sp.                | 37.4                        | 21.0                  | 16.9 | 17.8          |      |                    |                    | $\pm 1.1$          |                    | $\pm 1.1$          |                    |
| Pucéat <i>et al.</i> (2003)  | France                | Lower Campanian                             | <i>Squalicorax pristodontus</i>           | 37.4                        | 21.1                  | 16.5 | 17.3          |      |                    |                    | $\pm 1.1$          |                    | $\pm 1.1$          |                    |
| Pucéat <i>et al.</i> (2003)  | France                | Lower Campanian                             | <i>Cretiolamna appendiculata</i>          | 37.4                        | 21.0                  | 16.9 | 17.8          |      |                    |                    | $\pm 1.1$          |                    | $\pm 1.1$          |                    |
| Pucéat <i>et al.</i> (2003)  | France                | Lowermost Campanian                         | <i>Anomotodon</i> sp.                     | 37.4                        | 21.3                  | 15.6 | 16.4          |      |                    |                    | $\pm 1.0$          |                    | $\pm 1.1$          |                    |

Temperature 1: calculated using the equation from Kolodny *et al.* (1983) and a  $\delta^{18}\text{O}_{\text{seawater}}$  of -1‰SMOW.

Temperature 2: calculated using the equation from Kolodny *et al.* (1983), a  $\delta^{18}\text{O}$  of -1.25‰SMOW for the mean ocean, and including an adjustment for the  $\delta^{18}\text{O}_{\text{seawater}}$  that takes into account average latitudinal variations in evaporation and precipitation controls on  $\delta^{18}\text{O}_{\text{seawater}}$  by analogy with the modern ocean (see Material and Methods).

Error on temperature : calculated from both the analytical error derived from the reproducibility of oxygen isotope measurements ( $\pm 0.2\text{‰}$ , introducing an uncertainty of  $\pm 0.9^\circ\text{C}$  on isotopic temperatures), and from the uncertainty deriving from the choice of the fractionation equation (Lorant and Nutt, 1973; Kolodny *et al.*, 1983; Lécuyer *et al.*, 2003).

Fauna remains: Te (tooth enameloid), Tw (whole tooth).

Table DR2 (Data Repository item). Outputs of the statistical model.

| Class 1 vs Class 3                                                                                                                                                                                                  |  | Class 2 vs Class 4                                                                                                                                                                                                    |  | Class 1 vs Class 2                                                                                                                                                                                                          |  |
|---------------------------------------------------------------------------------------------------------------------------------------------------------------------------------------------------------------------|--|-----------------------------------------------------------------------------------------------------------------------------------------------------------------------------------------------------------------------|--|-----------------------------------------------------------------------------------------------------------------------------------------------------------------------------------------------------------------------------|--|
| Test A: linear fits of class 1 parallel to that of class 3 (d constant)                                                                                                                                             |  | Test A: linear fits of class 2 parallel to that of class 4 (d constant)                                                                                                                                               |  | Test A: linear fits of class 1 parallel to that of class 2 (d constant)                                                                                                                                                     |  |
| <b>Residuals</b><br>Minimum 1Q Median 3Q Maximum<br>-7.4322 -1.6950 -0.2377 2.5785 8.5012                                                                                                                           |  | <b>Residuals</b><br>Minimum 1Q Median 3Q Maximum<br>-7.0050 -2.2109 -0.4208 2.4201 7.8714                                                                                                                             |  | <b>Residuals</b><br>Minimum 1Q Median 3Q Maximum<br>-6.6571 -2.0517 -0.4271 1.7285 9.3353                                                                                                                                   |  |
| <b>Coefficients</b><br>Estimate Standard error t value Pr(> t )<br>a 33.57062 1.10234 30.454 <2e-16<br>b -0.23345 0.02857 -8.170 6e-11<br>d -3.78932 0.92393 -4.101 0.000142                                        |  | <b>Coefficients</b><br>Estimate Standard error t value Pr(> t )<br>a 25.20498 0.82474 30.561 <2e-16<br>b -0.19107 0.02441 -7.826 1.27e-11<br>d -3.41641 0.82093 -4.162 7.53e-5                                        |  | <b>Coefficients</b><br>Estimate Standard error t value Pr(> t )<br>a 35.33188 1.09485 32.271 <2e-16<br>b -0.29244 0.02863 -10.213 <2e-16<br>d -7.10480 0.78675 -9.031 3.89e-14                                              |  |
| Residual standard error : 3.274 on 53 degrees of freedom<br>Multiple R-Squared : 0.5741, Adjusted R-squared : 0.558<br>F-statistic : 35.72 on 2 and 53 degrees of freedom, p-value : 1.502e-10                      |  | Residual standard error : 3.198 on 85 degrees of freedom<br>Multiple R-Squared : 0.5111, Adjusted R-squared : 0.4995<br>F-statistic : 44.42 on 2 and 85 degrees of freedom, p-value : 6.218e-14                       |  | Residual standard error : 3.208 on 87 degrees of freedom<br>Multiple R-Squared : 0.6808, Adjusted R-squared : 0.6734<br>F-statistic : 92.77 on 2 and 87 degrees of freedom, p-value : <2.2e-16                              |  |
| Test B: linear fits of class 1 not parallel to that of class 3 (d variable)                                                                                                                                         |  | Test B: linear fits of class 2 not parallel to that of class 4 (d variable)                                                                                                                                           |  | Test B: linear fits of class 1 not parallel to that of class 2 (d variable)                                                                                                                                                 |  |
| <b>Residuals</b><br>Minimum 1Q Median 3Q Maximum<br>-6.6240 -1.9974 -0.2347 3.0464 9.3710                                                                                                                           |  | <b>Residuals</b><br>Minimum 1Q Median 3Q Maximum<br>-5.9551 -1.9531 -0.3995 1.7236 8.5614                                                                                                                             |  | <b>Residuals</b><br>Minimum 1Q Median 3Q Maximum<br>-6.624 -2.059 -0.427 1.738 9.371                                                                                                                                        |  |
| <b>Coefficients</b><br>Estimate Standard error t value Pr(> t )<br>a 35.40717 1.64771 21.489 <2e-16<br>b -0.29496 0.05011 -5.886 2.91e-07<br>d -6.25493 1.89384 -3.303 0.00174<br>d/b 0.09018 0.06067 1.486 0.14325 |  | <b>Coefficients</b><br>Estimate Standard error t value Pr(> t )<br>a 28.18961 1.00748 27.980 <2e-16<br>b -0.29118 0.03167 -9.194 2.41e-14<br>d -9.67336 1.59986 -6.046 3.85e-08<br>d/b 0.19552 0.04426 4.418 2.96e-05 |  | <b>Coefficients</b><br>Estimate Standard error t value Pr(> t )<br>a 35.407173 1.642078 21.562 <2e-16<br>b -0.294958 0.049637 -5.907 6.8e-08<br>d -7.217559 1.988479 -3.630 0.000481<br>d/b 0.003778 0.061127 0.62 0.950857 |  |
| Residual standard error : 3.237 on 52 degrees of freedom<br>Multiple R-Squared : 0.5915, Adjusted R-squared : 0.5679<br>F-statistic : 25.09 on 3 and 52 degrees of freedom, p-value : 3.546e-10                     |  | Residual standard error : 2.898 on 84 degrees of freedom<br>Multiple R-Squared : 0.6032, Adjusted R-squared : 0.5891<br>F-statistic : 42.57 on 3 and 84 degrees of freedom, p-value : <2.2e-16                        |  | Residual standard error : 3.226 on 86 degrees of freedom<br>Multiple R-Squared : 0.6808, Adjusted R-squared : 0.6697<br>F-statistic : 61.14 on 3 and 86 degrees of freedom, p-value : <2.2e-16                              |  |

**Class 1** and **Class 2** are composed of the sea surface temperatures estimated from the fish tooth  $\delta^{18}\text{O}$  from the mid-Cretaceous period and from the latest Cretaceous period, respectively (circles on Fig. 2), using the equation of Kolodny et al. (1983) and a  $\delta^{18}\text{O}$  of seawater of -1‰; **Class 3** and **Class 4** are composed of the sea surface temperatures estimated from the foraminifera  $\delta^{18}\text{O}$  from the mid-Cretaceous period and from the latest Cretaceous period, respectively (triangles on Fig. 2), using the equation of Erez and Luz (1983) and a  $\delta^{18}\text{O}$  of seawater of -1‰. The linear model used for these estimations is described below. The coefficients *a* and *b* represent the intercept and the slope of the linear fits for the fish tooth data, which appear on Fig. 2 (plain lines) and Fig. 3 (dotted lines) and *d* corresponds to the difference between the intercept of the two compared classes.

## STATISTICAL MODEL DESCRIPTION

For testing the validity of a statistical model, it is classical to set and test a null hypothesis, say  $H_0$ . For example, in the simplest of the several statistical models studied in this paper,  $H_0$  corresponds to the hypothesis that there is no linear relationship between our observations (e.g. temperature) and an explanatory variable like the latitude, i.e.  $H_0$  means that the slope is equal to zero. To measure how much evidence we have against  $H_0$ , we compute a p-value that is defined as a probability of observing a large estimated value of the slope under the assumption that  $H_0$  is true. For example, a p-value of .01 means there is a 1 in 100 chance the result occurred by chance. In this context, the classical interpretation of the p-value is that the smaller the p-value is, the more evidence we have against  $H_0$ . Hence, a very small p-value indicates a strong evidence against  $H_0$ , i.e. against the hypothesis that there is no linear relationship between our variables. A similar reasoning can be used to interpret the evidence that our data bring against all the statistical models and their associated null hypothesis that we have proposed. Traditionally, researchers reject the null hypothesis if the p-value is less than 0.05, i.e. this corresponds to the classical 95% confidence level.

Our statistical model can be written as a classical linear one (Venables and Ripley, 1994; Everitt, 1994) :

$$Y = X\beta + \varepsilon$$

Where the noise vector  $\varepsilon$  is assumed to have a zero-mean Gaussian distribution with covariance matrix  $\Sigma = \sigma^2 I$  with  $I$  being the identity matrix. Our goal is to assess if the linear functions fitting two data groups, say class 1 and class2, have the same slope or different ones. The response, i.e. the temperatures, can be described by the vector  $Y_{i,j,k}$  where the

subscripts  $i, j$ , and  $k$  correspond to the two classes ( $i = 1, 2$ ), the latitudes and the number of observations per latitude and group, respectively. The explanatory matrix  $X$  is equal to :

$$X = \begin{vmatrix} 1 & 0 & L_{1,1} \\ 1 & 0 & L_{1,2} \\ \cdot & \cdot & \cdot \\ \cdot & \cdot & \cdot \\ 1 & 0 & L_{1,n} \\ 1 & 1 & L_{2,1} \\ 1 & 1 & L_{2,2} \\ \cdot & \cdot & \cdot \\ \cdot & \cdot & \cdot \\ 1 & 1 & L_{2,m} \end{vmatrix}$$

Where  $L_{i,l}$  represents the latitudes. These latitudes are divided with respect to the two classes ( $i=1,2$ ), a total of  $n$  observations from the class period 1 and a total of  $m$  records from the class period 2. The first column of ones in the matrix  $X$  corresponds to the intercept part. The vector  $\beta$  has three unknown parameters  $\beta = (a, d, b)^T$  where  $a$  and  $b$  represent the intercept and the slope of the linear function fitting class 1 and  $d$  corresponds to the difference between the intercept of class 1 and the intercept of class 2. The zeroes in the second column indicate that the distance  $d$  has no effect on the first line. In comparison, the ones in the second part of the second column represent the effect of  $d$ .

We chose to work with this simple model, which includes only three parameters, because the scarcity of available records makes otherwise the risk of over-fitting high. The different linear models tested, as well as their fit quality, are summarized above.

## REFERENCES CITED IN DATA REPOSITORY ITEMS

- Erez, J. and Luz, B. Experimental paleotemperature equation for planktonic formaminifera, *Geochim. Cosmochim. Acta* **47**, 1025-1031 (1983).
- Everitt, B.S., 1994, A Handbook of Statistical Analyses using S-Plus: Chapman and Hall, London.
- IAEA/WMO (2001). Global network of Isotopes in Precipitation. The GNIP Database. Accessible at : <http://isohis.iaea.org>.
- Kolodny, Y., Luz, B. and Navon, O. Oxygen isotope variations in phosphate of biogenic apatites, I. Fish bone apatite-rechecking the rules of the game, *Earth Planet. Sci. Lett.* **64**, 398-404 (1983).
- Kolodny, Y. and Raab, M. Oxygen isotopes in phosphatic fish remains from Israel: Paleothermometry of tropical Cretaceous and Tertiary shelf waters, *Palaeogeogr. Palaeoclimatol. Palaeoecol.* **64**, 59-67 (1988).
- Kolodny, Y. and Luz, B. Oxygen isotopes in phosphates of fossil fish: Devonian to recent, in *Stable Isotope Geochemistry: A Tribute to Samuel Epstein*, edited by H. P. Taylor Jr., J. R. O'Neil and I. R. Kaplan, *Spec. Publ. Geochem. Soc.*, **3**, 105-119, University Park, PA, USA (1991).
- Lécuyer, C., Grandjean, P., O'Neil, J. R., Cappetta, H. and Martineau, F. Thermal excursions in the ocean at the Cretaceous-Tertiary boundary (northern Morocco):  $\delta^{18}\text{O}$  record of phosphatic fish debris. *Palaeogeogr. Palaeoclimatol. Palaeoecol.* **105**, 235-243 (1993).
- Lécuyer, C., Picard, S., Garcia, J.-P., Sheppard, S.M.F., Grandjean, P. and Dromart, G. Thermal evolution of Tethyan surface waters during the Middle-Late Jurassic: Evidence

from  $\delta^{18}\text{O}$  values of marine fish teeth. *Paleoceanography* **18-3**, 21.1-21.14, doi 10.1029/2002PA000863 (2003).

LEVITUS94: World Ocean Atlas 1994. Available online at <http://ingrid.ldeo.columbia.edu/SOURCES/.LEVITUS94>

Longinelli, A and Nuti, S. Revised phosphate-water isotopic temperature scale. *Earth Planet. Sci. Lett.* **19**, 373-376 (1973).

National Oceanographic Data Center. NODC Coastal Water Temperature Guides. US Department of Commerce, National Oceanic and Atmospheric Administration (1983)  
Available online at <http://www.nodc.noaa.gov/dsdt/wtg12.html>.

Puc  at, E., L  cuyer, C., Sheppard, S. M. F., Dromart, G., Reboulet, S., and Grandjean, P.  
Thermal evolution of Cretaceous Tethyan marine waters inferred from oxygen isotope composition of fish tooth enamels. *Paleoceanography* **18-2**, 7.1-7.12 (2003).

Venables, W.N., and Ripley, B.D., 1994, Modern Applied Statistics with S-Plus: Springer, New York.
